# Supplementary material for: A social-ecological analysis of ecosystem services supply and trade-offs in European wood-pastures
Source: PubMed Central journal article supplement — Sci Adv. 2018 May 2;4(5):eaar2176. doi: 10.1126/sciadv.aar2176 (PMC5931750; doi:10.1126/sciadv.aar2176), 2018-05-02
Supplement: aar2176_SM.pdf [file aar2176_SM.pdf]

## Supplementary Materials for

### **A social-ecological analysis of ecosystem services supply and trade-offs in European wood-pastures**

Mario Torralba, Nora Fagerholm, Tibor Hartel, Gerardo Moreno, Tobias Plieninger

Published 2 May 2018, *Sci. Adv.* **4**, ear2176 (2018)

DOI: 10.1126/sciadv.aar2176

#### **This PDF file includes:**

- table S1. English version of the initial questions in the semistructured questionnaires.
- table S2. Average ( $\pm$ SD) values of ES supply values for each study area.
- table S3. Summary statistics of the MFA.

## SUPPLEMENTARY MATERIALS

**table S1. English version of the initial questions in the semistructured questionnaires.**

|                                                                                                                                                    |             |
|----------------------------------------------------------------------------------------------------------------------------------------------------|-------------|
| Total area of managed land (Ha)                                                                                                                    |             |
| Number of farm units                                                                                                                               |             |
| How many people live in the farm?                                                                                                                  | Permanently |
|                                                                                                                                                    | Temporary   |
| How many houses do the farm have?                                                                                                                  | Permanently |
|                                                                                                                                                    | Vacations   |
| Which other buildings exist in the farm?                                                                                                           |             |
| % wood pasture                                                                                                                                     | Owned       |
|                                                                                                                                                    | Rented      |
| % forest                                                                                                                                           | Owned       |
|                                                                                                                                                    | Rented      |
| % tree less pasture                                                                                                                                | Owned       |
|                                                                                                                                                    | Rented      |
| % agriculture                                                                                                                                      | Owned       |
|                                                                                                                                                    | Rented      |
| Sex                                                                                                                                                |             |
| Age                                                                                                                                                |             |
| Main purpose for owning the land                                                                                                                   |             |
| Continuity in the management (years)                                                                                                               |             |
| How many people work the land?                                                                                                                     | Permanent   |
|                                                                                                                                                    | Temporal    |
| How many family members work/collaborate in the farm? Fulltime? Part time? (in case part time how much) Seasonally? (in case is seasonal for what) |             |
| Do you help and/or receive help from other farmers (for what activities)?                                                                          |             |
| How do you pay for the temporary work?                                                                                                             | Money       |
|                                                                                                                                                    | Products    |
|                                                                                                                                                    | Both        |
| How do you delimit your farmland? (Do you fence?) Everything? For which reasons?                                                                   |             |
| What material do you use for fencing?                                                                                                              |             |
| How much distance to you fence (km)?                                                                                                               |             |
| How many rivers and water courses cross your land?                                                                                                 |             |
| Do you have any other source of water (Whoch? How many?)                                                                                           |             |
| How many animals do you have?                                                                                                                      | Cows        |

|                                                                                                       |                      |
|-------------------------------------------------------------------------------------------------------|----------------------|
|                                                                                                       | Pigs                 |
|                                                                                                       | Sheep                |
|                                                                                                       | Goats                |
|                                                                                                       | Chicken              |
|                                                                                                       | Bee hives            |
|                                                                                                       | Horses               |
|                                                                                                       | Others               |
| Which breeds of animals do you have? Which ones are traditional?                                      |                      |
| What do you produce on the farm?                                                                      |                      |
| Which % of the animal supplementary fodder do you..                                                   | Cultivate            |
|                                                                                                       | Import               |
| What type of fodder do you buy and how much it is approximately? (kg/year)                            |                      |
| How much time do the animals graze in the pasture?                                                    |                      |
| Do you produce wool? What do you do with it?                                                          |                      |
| How many animals do you loose due to "natural death" (illness...)                                     |                      |
| Do you apply for CAP grants? Which ones?                                                              |                      |
| Do you cut trees? How many ha? How much wood do you extract/year?                                     |                      |
| Do you get external help for cutting the wood? How do you pay this: with wood or money?               |                      |
| What do you do with the cut wood? (%s)                                                                |                      |
| Do you practice organic farming?                                                                      |                      |
| How much money do you invest per year in                                                              | Pesticides           |
|                                                                                                       | Fertilizants         |
|                                                                                                       | Gasoil               |
|                                                                                                       | Supplementary fodder |
|                                                                                                       | Salaries             |
| How much do you fertilize? (ha/year)                                                                  |                      |
| How much artificial fertilizant do you ise? (ton/year)                                                |                      |
| Do you fertilize with animal manure? How often? How much do you use? (tons/year)                      |                      |
| Do you cultivate land? (Ha) What do you cultivate? (in Ha)                                            |                      |
| Do you use pesticide? How many times/year?                                                            |                      |
| Do you rotate the crops? (Which)                                                                      |                      |
| Do you plough the land? (Ha/year)                                                                     |                      |
| How is the distribution of your farm products? (Local vs non local in %.)                             |                      |
| How many access do your farm have (Trails/roads)                                                      |                      |
| Is the access public to your farm?                                                                    |                      |
| Is there any other product harvested in your land? (mushrooms, berries...) Which? How often? By whom? |                      |

|                                                                                                    |  |
|----------------------------------------------------------------------------------------------------|--|
| Is there any building/trace of historical/cultural value in your land?                             |  |
| Is there any festivity, recreational activity organized in your land? Which? How often?            |  |
| Do people use your land for recreational purposes (running, walking, bird watching...)? How often? |  |
| Is there hunting in you land? Who? How many animals are hunted approximately/year? (and which)     |  |
| Is there fishing in you land? Who? How many fishes are fished approximately/year? (and which)      |  |
| What are the main challenges you confront in your work                                             |  |
| How does your work (and the way of life it involves) contribute to your quality of life?           |  |

**table S2. Average ( $\pm$ SD) values of ES supply values for each study area.**

| ES indicator                   |                            | Östergötland | Southern Transylvania | Llanos de Trujillo | La Serena |
|--------------------------------|----------------------------|--------------|-----------------------|--------------------|-----------|
| Animal production              | Mean                       | 0.730        | 0.606                 | 0.703              | 0.483     |
|                                | SD                         | 0.726        | 0.423                 | 0.324              | 0.260     |
| Number of products             | Mean                       | 5.778        | 5.447                 | 5.405              | 8.263     |
|                                | SD                         | 1.355        | 1.501                 | 2.750              | 2.232     |
| Cereal production              | Mean                       | 53.114       | 31.362                | 5.770              | 68.827    |
|                                | SD                         | 21.299       | 23.541                | 8.272              | 26.554    |
| Authochtonous breeds           | Mean                       | 0.833        | 3.000                 | 0.833              | 1.684     |
|                                | SD                         | 0.971        | 1.319                 | 1.057              | 0.749     |
| Timber production              | Mean                       | 272.381      | 0.501                 | 33.342             | 54.553    |
|                                | SD                         | 342.421      | 1.086                 | 44.522             | 60.361    |
| Mineral inputs                 | Mean                       | 49.319       | 2.039                 | 4.528              | 5.704     |
|                                | SD                         | 30.153       | 4.481                 | 13.095             | 4.012     |
| Capital input                  | Mean                       | 483.984      | 101.985               | 118.699            | 100.636   |
|                                | SD                         | 256.004      | 85.444                | 97.614             | 77.396    |
| Historic and cultural features | Rel. Frequency Presence    | 77.778       | 2.128                 | 26.190             | 5.263     |
|                                | Rel. Frequency No Presence | 22.222       | 97.872                | 73.810             | 94.737    |
| Outdoor recreation             | Rel. Frequency Presence    | 94.444       | 29.787                | 61.905             | 52.632    |
|                                | Rel. Frequency No Presence | 5.556        | 70.213                | 38.095             | 47.368    |
| Recreation Events              | Rel. Frequency Presence    | 44.444       | 100.000               | 11.905             | 73.684    |
|                                | Rel. Frequency No Presence | 55.556       | 0.000                 | 88.095             | 26.316    |
| Nature recreation              | Rel. Frequency Presence    | 50.000       | 55.319                | 69.048             | 10.526    |
|                                | Rel. Frequency No Presence | 50.000       | 44.681                | 30.952             | 89.474    |
| Harvesting of wild products    | Rel. Frequency Presence    | 77.778       | 40.426                | 78.571             | 100.000   |
|                                | Rel. Frequency No Presence | 22.222       | 59.574                | 21.429             | 0.000     |
| Recreation Hunting             | Rel. Frequency Presence    | 97.222       | 0.000                 | 92.857             | 94.737    |
|                                | Rel. Frequency No Presence | 2.778        | 100.000               | 7.143              | 5.263     |

**table S3. Summary statistics of the MFA.**

| Variables                                  | F1            | F2            | F3            | F4           |
|--------------------------------------------|---------------|---------------|---------------|--------------|
| Productivity related trade-offs            | <b>0.900</b>  | 0.117         | -0.294        | 0.027        |
| Crop production related trade-offs         | 0.062         | <b>0.797</b>  | <b>0.493</b>  | -0.284       |
| Multifunctionality related trade-offs      | 0.250         | -0.260        | <b>0.725</b>  | <b>0.572</b> |
| Accessibility related trade-offs           | -0.183        | <b>0.485</b>  | -0.352        | <b>0.765</b> |
| Land use diversity                         | 0.053         | <b>0.651</b>  | 0.189         | 0.124        |
| Property size                              | <b>0.829</b>  | -0.053        | 0.160         | 0.167        |
| Hired workforce                            | <b>0.563</b>  | 0.327         | 0.029         | 0.090        |
| Local products distribution ratio          | <b>0.401</b>  | <b>-0.390</b> | 0.073         | 0.254        |
| Family involvement                         | <b>-0.395</b> | 0.213         | -0.011        | -0.040       |
| Self-consumption ratio                     | <b>-0.783</b> | 0.079         | 0.256         | 0.139        |
| Proportion of the property privately owned | -0.107        | <b>0.273</b>  | 0.226         | -0.133       |
| Property access policy                     | -0.255        | <b>0.498</b>  | <b>-0.398</b> | 0.199        |
| Fuel consumption                           | <b>0.670</b>  | 0.182         | 0.049         | -0.068       |
| Use of animal workforce                    | <b>-0.457</b> | 0.214         | 0.176         | 0.010        |
| Economic investment                        | <b>0.880</b>  | 0.289         | -0.075        | -0.176       |
| Östergötland                               | 1.048         | 0.890         | -0.617        | -0.154       |
| Southern Transylvania                      | -1.581        | 0.555         | 0.390         | 0.107        |
| Llanos de Trujillo                         | 0.359         | -1.214        | -0.540        | -0.048       |
| La Serena                                  | 1.048         | -0.346        | 1.419         | 0.138        |
| <i>Eigenvalue</i>                          | 1.791         | 1.251         | 1.060         | 1.033        |
| <i>Variance explained (%)</i>              | 26.381        | 18.429        | 15.608        | 15.222       |
| <i>Cumulative variance (%)</i>             | 26.381        | 44.809        | 60.417        | 75.640       |
